# Supplementary material for: Targeted genome editing by lentiviral protein transduction of zinc-finger and TAL-effector nucleases
Source: eLife journal article supplement (doi:10.7554/elife.01911), 2014-04-24
Supplement: supp [file elife-01911-supp-v1.zip]

### CCR5 mutations in HEK293 induced by LP-ZFNLR(CCR5)

|                                                                             |     |
|-----------------------------------------------------------------------------|-----|
| TTGGTTTTGTGGGCAACATGCTGGTCATCCTCATCCTGATAAACTGCAAAAGGCTGAAGAGCATGACTGACATCT | WT  |
| TTGGTTTTGTGGGCAACATGCTGGTCATCCTCATC-----AAAAGGCTGAAGAGCATGACTGACATCT        | -12 |
| TTGGTTTTGTGGGCAACATGCTGGTCATCC-----CTGATAAACTGCAAAAGGCTGAAGAGCATGACTGACATCT | -5  |
| TTGGTTTTGTGGGCAACATGCTGGTCATCCTCAT-----AAACTGCAAAAGGCTGAAGAGCATGACTGACATCT  | -6  |
| TTGGTTTTGTGGGCAACATGCTGGTCATCCTCATCCTGATAAACTGCAGaAGGCTGAAGAGCATGACTGACATCT | 0   |
| TTGGTTTTGTGGGCAACATGCTGGTCATCCTCATCCTGATccACTGCAAAAGGCTGAAGAGCATGACTGACATCT | 0   |
| TTGGTTTTGTGGGCAACATGCTGGTCATCCTCATCCTGATtAAACTGCAAAAGGCTGAAGAGCATGACTGACATC | +1  |
| TTGGTTTTGTGGGCAACATGCTGGTCATCCTCATCCTGATtgatAAACTGCAAAAGGCTGAAGAGCATGACTGAC | +4  |

### CCR5 mutations in NHDFs induced by LP-ZFNLR(CCR5)

|                                                                             |     |
|-----------------------------------------------------------------------------|-----|
| TTGGTTTTGTGGGCAACATGCTGGTCATCCTCATCCTGATAAACTGCAAAAGGCTGAAGAGCATGACTGACATCT | WT  |
| TTGGTTTTGTGGGCAACATGCTGGTCATCCTCA-----AAACTGCAAAAGGCTGAAGAGCATGACTGACATCT   | -7  |
| TTGGTTTTGTGGGCAACATGCTGGTCATCCTCA-----AAAGGCTGAAGAGCATGACTGACATCT           | -15 |
| TTGGTTTTGTGGGCAACATGCTGGTCATCCTCATC-----AAACTGCAAAAGGCTGAAGAGCATGACTGACATCT | -5  |
| TTGGTTTTGTGGGCAACATGCTGGTCATCCTCATC-----TGCAAAAGGCTGAAGAGCATGACTGACATCT     | -9  |
| TTGGTTTTGTGGGCAACATGCTGGTCATCCTCATCtAaAAACTGCAAAAaGCTGAAGAGCATGACTGACATCT   | 0   |
| TTGGTTTTGTGGGCAACATGCTGGTCATCCTCATCCT--cAAACTGCAAAAGGCTGAAGAGCATGACTGACATCT | -2  |
| TTGGTTTTGTGGGCAACATGCTGGTCATCCTCATCCTGATctgatAAACTGCAAAAGGCTGAAGAGCATGACTGA | +5  |

### CCR5 mutations in HKs induced by LP-ZFNLR(CCR5)

|                                                                             |     |
|-----------------------------------------------------------------------------|-----|
| TTGGTTTTGTGGGCAACATGCTGGTCATCCTCATCCTGATAAACTGCAAAAGGCTGAAGAGCATGACTGACATCT | WT  |
| TTGGTTTTGTGGGCAACATGCTGGTCATCC-----CTGATAAACTGCAAAAGGCTGAAGAGCATGACTGACATCT | -5  |
| TTGGTTTTGTGGGCAACATGCTGGTCATCCTCATCCTGAT-----GCAAAAGGCTGAAGAGCATGACTGACATCT | -5  |
| TTGGTTTTGTGGGCAACATGCTGGTCATCCTCATC-----TGCAAAAGGCTGAAGAGCATGACTGACATCT     | -9  |
| TTGGTTTTGTGGGCAACATGCTGGTCATCCTCATC-----AAACTGCAAAAGGCTGAAGAGCATGACTGACATCT | -5  |
| TTGGTTTTGTGGGCAACA-----GCAAAAGGCTGAAGAGCATGACTGACATCT                       | -27 |
| TTGGTTTTGTGGGCAAC-----AAAGGCTGAAGAGCATGACTGACATCT                           | -31 |
| TTGGTTTTGTGGGCAACATGCTGGTC-----TGATAAACTGCAAAAGGCTGAAGAGCATGACTGACATCT      | -10 |
| TTGGTTTTGTGGGCAACATGCTGGTCATCCTCATCCTGATAAA-----AGGCTGAAGAGCATGACTGACATCT   | -7  |
| TTGGTTTTGTGGGCAACATGCTGGTCATCCTCATCtTtAaAAACTGCAAAAaGCTGAAGAGCATGACTGACATCT | 0   |
| TTGGTTTTGTGGGCAACATGCTGGT-----AATAAACTGCAAAAaGCTGAAGtGCTtTGACTGACATtT       | -12 |
| TTGGTTTTGTGGGCAACATGCTGGTCATCCTCATCCTGATctgatAAACTGCAAAAGGCTGAAGAGCATGACTGA | +5  |
