# Supplementary material for: Targeted genome editing by lentiviral protein transduction of zinc-finger and TAL-effector nucleases
Source: eLife journal article supplement (doi:10.7554/elife.01911), 2014-04-24
Supplement: supp [file elife-01911-supp-v1.zip]

### AAVS1 mutations in HEK293 induced by LP-ZFNLR(AAVS1)

|                                                                                                                                                        |          |
|--------------------------------------------------------------------------------------------------------------------------------------------------------|----------|
| GGGTACTTTTATCTGTCCCTCCACCCACAGTGGGGCCACTAGGGACAGGATTGGTGACAGAAAAGCCCCATCC                                                                              | WT       |
| GGGTACTTTTATCTGTCCCTCCACCC-----GCCACTAGGGACAGGATTGGTGACAGAAAAGCCCCATCC                                                                                 | -9       |
| GGGTACTTTTATCTGTCCCTCCACCCA-----GGATTGGTGACAGAAAAGCCCCATCC                                                                                             | -20 (x2) |
| GGGTACTTTTATCTGTCCCTCCACCCACAGTGG-----ACAGGATTGGTGACAGAAAAGCCCCATCC                                                                                    | -11      |
| GGGTACTTTTATCTG-----ACCCACAGTGGGGCCACTAGGGACAGGATTGGTGACAGAAAAGCCCCATCC                                                                                | -8       |
| GGGTACTTTTATCTGTCCCTCCACCCACAGTGGGGCCAGGTAACCACTTGGCCAggttaaccagcttgccag<br>gtgacacgcagtggtgaggaaggggagggccactaggccagctgcgccaCTAGGGACAGGATTGGTGACAGAAA | +68      |

### AAVS1 mutations in NHDFs induced by LP-ZFNLR(AAVS1)

|                                                                           |          |
|---------------------------------------------------------------------------|----------|
| GGGTACTTTTATCTGTCCCTCCACCCACAGTGGGGCCACTAGGGACAGGATTGGTGACAGAAAAGCCCCATCC | WT       |
| GGGTACTTTTATCTGTCCCTCCACCCACAGTGG-----ACAGGATTGGTGACAGAAAAGCCCCATCC       | -11      |
| GGGTACTTTTATCTGTCCCTCCACCCACAGTGGG-----ACAGGATTGGTGACAGAAAAGCCCCATCC      | -10 (x3) |
| GGGTACTTTTATCTGTCCCTCCACCCACAGTGGGGCA-----ACAGGATTGGTGACAGAAAAGCCCCATCC   | -6       |
| GGGTACTTTTATCTGTCCCTCCACCCACAGT-----GGGACAGGATTGGTGACAGAAAAGCCCCATCC      | -10      |
| GGGTACTTTTATCTGTCCCTCCACCCACAGTGGGGCAgccaCTAGGGACAGGATTGGTGACAGAAAAGCCCC  | +4       |

### AAVS1 mutations in HKs induced by LP-ZFNLR(AAVS1)

|                                                                            |          |
|----------------------------------------------------------------------------|----------|
| GGGTACTTTTATCTGTCCCTCCACCCACAGTGGGGCCACTAGGGACAGGATTGGTGACAGAAAAGCCCCATCC  | WT       |
| GGGTACTTTTATCTGTCCCTCCACCCACAGTGGG-----ACAGGATTGGTGACAGAAAAGCCCCATCC       | -10 (x2) |
| GGGTACTTTTATCTGTCCCTCCACCCACAG-----GGACAGGATTGGTGACAGAAAAGCCCCATCC         | -12 (x2) |
| GGGTACTTTTATCTGTCCCTCCACCCACAGTGGG-----CTAGGGACAGGATTGGTGACAGAAAAGCCCCATCC | -4       |
| GGGTACTTTTATCTGTCCCTCCACCCAC-----AGGGACAGGATTGGTGACAGAAAAGCCCCATCC         | -12 (x2) |
| GGGTACTTTTATCTGTCCCTCCACCCACA-----TAGGGACAGGATTGGTGACAGAAAAGCCCCATCC       | -10      |
