# Supplementary material for: Targeted genome editing by lentiviral protein transduction of zinc-finger and TAL-effector nucleases
Source: eLife journal article supplement (doi:10.7554/elife.01911), 2014-04-24
Supplement: supp [file elife-01911-supp-v1.zip]

Mutations in HEK293-eGFPmut reporter cells induced by LP-ZFNLR(gfp)

|                                                            |         |
|------------------------------------------------------------|---------|
| GCGTGCAGTGCTTCAGCCGCTACCCCTAACATGAAGCAGCAGACTTCTTCAAGTCCG  | WT      |
| GCGTGCAGTGCTTCAGCCGCTACCCCTAACA-----GCAGCAGACTTCTTCAAGTCCG | -4      |
| GCGT-----TCTTCAAGTCCG                                      | -42     |
| GCGTGCAGTGCTTCAGCCGCTAC-----TCTTCAAGTCCG                   | -22     |
| GCGTGCAGTGCTcCAGCCGCTACCCCTAACATGAAGCAGCAGACTTCTTCAAGTCCG  | 0       |
| GCGTGCAGTGCTTCAGCCGCTACCCCTAAaCATGAAGCAGCAGACTTCTTCAAGTCC  | +1      |
| GCGTGCAGTGCTTCAGCCGCTACCCCTAACAaacaTGAAGCAGCAGACTTCTTCAAG  | +4 (x3) |
