# Supplementary figures and images for: Targeted genome editing by lentiviral protein transduction of zinc-finger and TAL-effector nucleases
Source: eLife journal article supplement (doi:10.7554/elife.01911), 2014-04-24

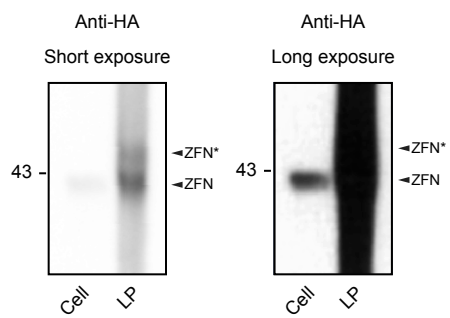

Supplement: supp [file elife-01911-supp-v1.zip]

A

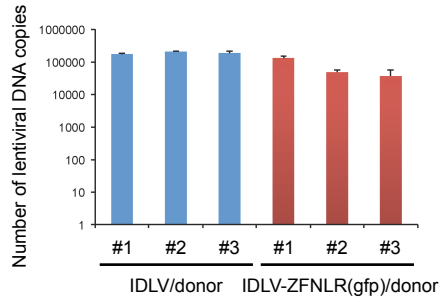

B

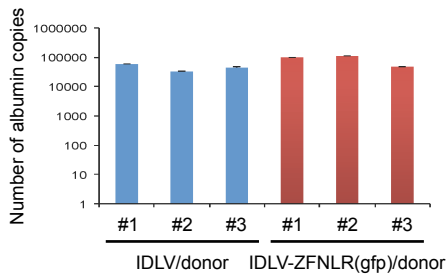

C

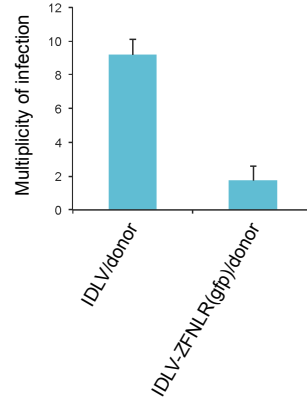

D

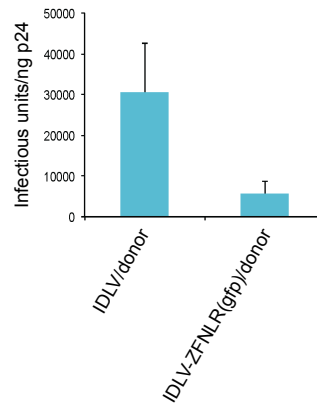

Supplement: supp [file elife-01911-supp-v1.zip]
